# Supplementary material for: Discovering putative prion sequences in complete proteomes using probabilistic representations of Q/N-rich domains
Source: PubMed Central journal article supplement (PMC3654983; doi:10.1186/1471-2164-14-316), 2013-05-10
Supplement: 1471-2164-14-316-S8.pdf [file 1471-2164-14-316-S8.pdf]

E9PYT8\_MOUSE Window Position=203; Score=53.408 | Prion Domain: RGTSRNSKLGQ...  
E9Q29\_MOUSE Window Position=229; Score=51.049 | Prion Domain: GSGSHGSGGSS...  
Q8BQ27\_MOUSE Window Position=157; Score=95.156 | Prion Domain: HQ...  
F7BY8\_MOUSE Window Position=20; Score=87.840 | Prion Domain: HQ...  
>Mus spretus: Total=1  
SRY\_MUS51 Window Position=174; Score=55.723 | Prion Domain: QQQQ...  
>Brachytarsomys albicauda: Total=1  
Q25AW7\_BRAAL Window Position=142; Score=81.224 | Prion Domain: AGTM...  
>Mus musculus castaneus: Total=1  
O35863\_MUSMC Window Position=143; Score=68.906 | Prion Domain: QQQQ...  
>Cricetulus griseus: Total=9  
G31483\_CRIGR Window Position=31; Score=144.488 | Prion Domain: NNNNN...  
G3HWZ0\_CRIGR Window Position=12; Score=83.124 | Prion Domain: TVDMS...  
G3HB51\_CRIGR Window Position=181; Score=57.247 | Prion Domain: QQM...  
G3I191\_CRIGR Window Position=317; Score=51.090 | Prion Domain: LQQ...  
G3I9K3\_CRIGR Window Position=476; Score=60.406 | Prion Domain: TQQ...  
G3I281\_CRIGR Window Position=2433; Score=67.211 | Prion Domain: GSSL...  
G3GX64\_CRIGR Window Position=83; Score=67.243 | Prion Domain: GQL...  
G3H7E1\_CRIGR Window Position=364; Score=59.859 | Prion Domain: SLL...  
G3H510\_CRIGR Window Position=155; Score=73.740 | Prion Domain: QV...  
>Mus spicilegus: Total=1  
SRY\_MUS51 Window Position=165; Score=56.488 | Prion Domain: QQQQ...  
>Heterocephalus glaber: Total=1  
G5APD7\_HETGA Window Position=120; Score=91.510 | Prion Domain: QQQQ...  
>Rattus norvegicus: Total=42  
FOX2\_RAT Window Position=148; Score=85.344 | Prion Domain: QLL...  
HCN1\_RAT Window Position=714; Score=57.482 | Prion Domain: QLS...  
TOX3\_RAT Window Position=444; Score=74.119 | Prion Domain: QQQ...  
FOX1\_RAT Window Position=52; Score=83.006 | Prion Domain: HVG...  
F1M290\_RAT Window Position=2; Score=70.320 | Prion Domain: QV...  
F1M7M4\_RAT Window Position=396; Score=58.354 | Prion Domain: QQQ...  
D3ZVC3\_RAT Window Position=342; Score=65.790 | Prion Domain: QQ...  
D4AA6\_RAT Window Position=509; Score=68.385 | Prion Domain: QSL...  
F1LXT5\_RAT Window Position=0; Score=122.640 | Prion Domain: QQQ...  
D3ZNB9\_RAT Window Position=387; Score=55.708 | Prion Domain: QQQ...  
D3ZK10\_RAT Window Position=904; Score=56.248 | Prion Domain: MQ...  
F1LZG1\_RAT Window Position=6; Score=122.640 | Prion Domain: QQQ...  
F1M6N5\_RAT Window Position=114; Score=85.887 | Prion Domain: QQQ...  
D3ZSX6\_RAT Window Position=238; Score=66.361 | Prion Domain: QQ...  
F1LNE1\_RAT Window Position=409; Score=77.564 | Prion Domain: QQ...  
F1LUF5\_RAT Window Position=7; Score=98.715 | Prion Domain: QQQ...  
G3V684\_RAT Window Position=160; Score=85.887 | Prion Domain: QQQ...  
F1M547\_RAT Window Position=2176; Score=79.214 | Prion Domain: SLL...  
Q7T72\_RAT Window Position=441; Score=110.706 | Prion Domain: SNN...  
F1LVY0\_RAT Window Position=419; Score=66.361 | Prion Domain: QQ...  
D2RYG5\_RAT Window Position=30; Score=54.604 | Prion Domain: TQQ...  
F1M8P1\_RAT Window Position=30; Score=54.604 | Prion Domain: TQQ...  
D3ZM1\_RAT Window Position=30; Score=54.604 | Prion Domain: TQQ...  
F1M3W1\_RAT Window Position=20; Score=122.640 | Prion Domain: QQQ...  
D3ZG21\_RAT Window Position=150; Score=68.061 | Prion Domain: YQQ...  
D3ZFW4\_RAT Window Position=120; Score=85.887 | Prion Domain: QQQ...  
D4A0B4\_RAT Window Position=766; Score=52.744 | Prion Domain: TQQ...  
F1M4Q6\_RAT Window Position=2179; Score=81.349 | Prion Domain: QQQ...  
D3SYQ0\_RAT Window Position=235; Score=58.354 | Prion Domain: QQQ...  
D3ZCA3\_RAT Window Position=2060; Score=102.009 | Prion Domain: QQQ...  
F1M1Q1\_RAT Window Position=4; Score=115.538 | Prion Domain: QQQ...  
F1LW0\_RAT Window Position=9; Score=57.383 | Prion Domain: SQQ...  
D3ZRQ8\_RAT Window Position=145; Score=56.807 | Prion Domain: GGV...  
F1M4J8\_RAT Window Position=65; Score=85.344 | Prion Domain: QLL...  
D4A3J8\_RAT Window Position=49; Score=85.887 | Prion Domain: QQQ...  
F1M3B2\_RAT Window Position=425; Score=95.132 | Prion Domain: QS...  
D4A5D2\_RAT Window Position=2034; Score=102.009 | Prion Domain: QQQ...  
Q6TXG0\_RAT Window Position=121; Score=121.742 | Prion Domain: NNN...  
D3ZDE6\_RAT Window Position=2055; Score=102.009 | Prion Domain: QQQ...  
D3ZVD1\_RAT Window Position=421; Score=65.790 | Prion Domain: QQ...  
F1LSM1\_RAT Window Position=1192; Score=58.597 | Prion Domain: QQQ...  
F1M7D7\_RAT Window Position=71; Score=85.344 | Prion Domain: QLL...
