# Supplementary material for: Discovering putative prion sequences in complete proteomes using probabilistic representations of Q/N-rich domains
Source: PubMed Central journal article supplement (PMC3654983; doi:10.1186/1471-2164-14-316), 2013-05-10
Supplement: 1471-2164-14-316-S10.pdf [file 1471-2164-14-316-S10.pdf]

B7ZL21\_HUMAN Window Position=587; Score=102.432 | Prion Domain: QQQQQQQQQQQQQQQQQQQQQQQQQQQSSISAQQQQQQSSISAQQQQQQQQQQ  
Q6QR78\_HUMAN Window Position=15; Score=97.509 | Prion Domain: QQRQQQQQQQQQQQQQQQQQQQQQQQQQQQQQQQQQQQQQQQAVAAAAVQQS  
D3VVQ2\_HUMAN Window Position=281; Score=89.054 | Prion Domain: RKRREAYFEKQQQQQQQQQQQQQQQQQQQQQQQQQQQQQQQQQQQQQQQQ  
Q86X94\_HUMAN Window Position=31; Score=54.707 | Prion Domain: SQSYSGYGQTTDSYQNYSGYSSYGQSQSGYSQSYGGYENQKQSSYSQQPPYNNQGGQQN  
B4DM43\_HUMAN Window Position=9; Score=68.314 | Prion Domain: QQQQLQQQQQQQLIKLHHQNIQQQQQLQRIQLQLQQQQQQQQQQQQQL
