# Supplementary material for: Discovering putative prion sequences in complete proteomes using probabilistic representations of Q/N-rich domains
Source: PubMed Central journal article supplement (PMC3654983; doi:10.1186/1471-2164-14-316), 2013-05-10

### Bacteria

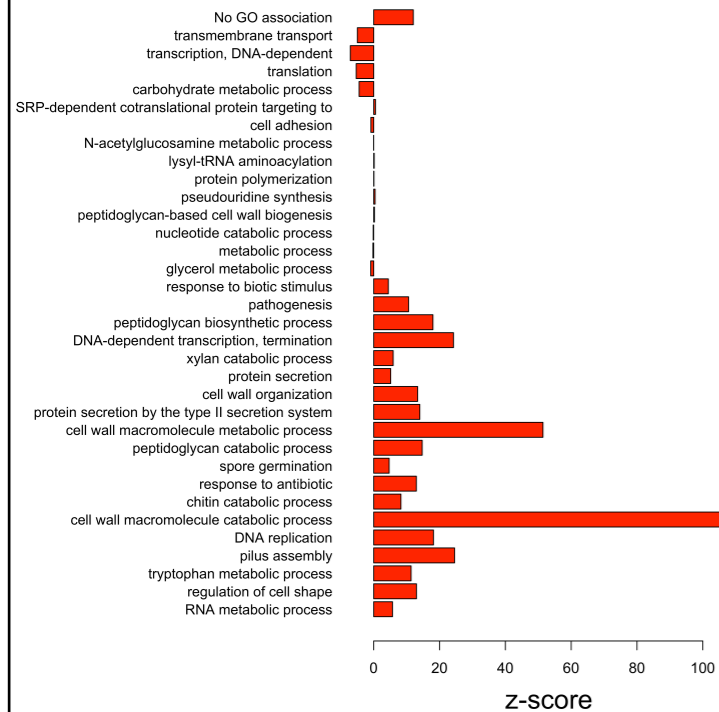

### Fungi

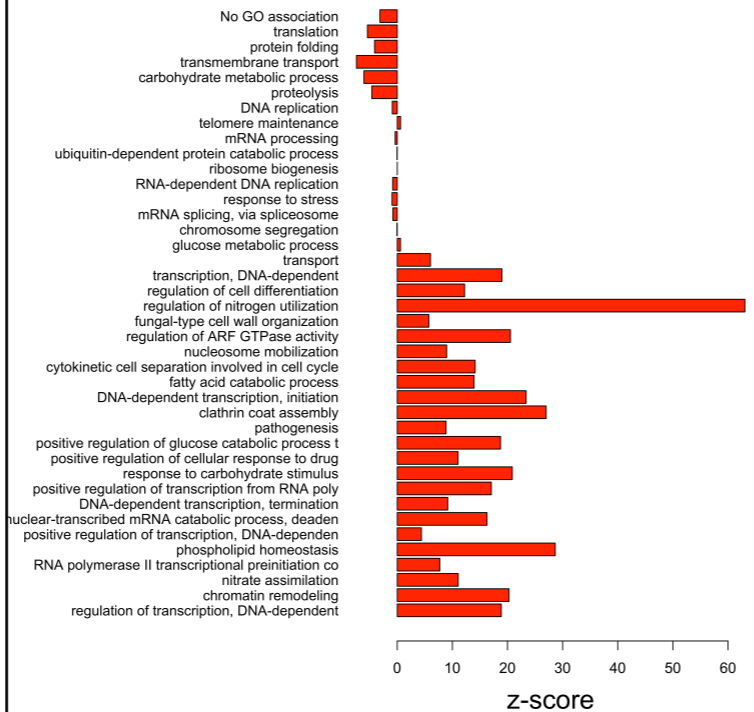

### Plants

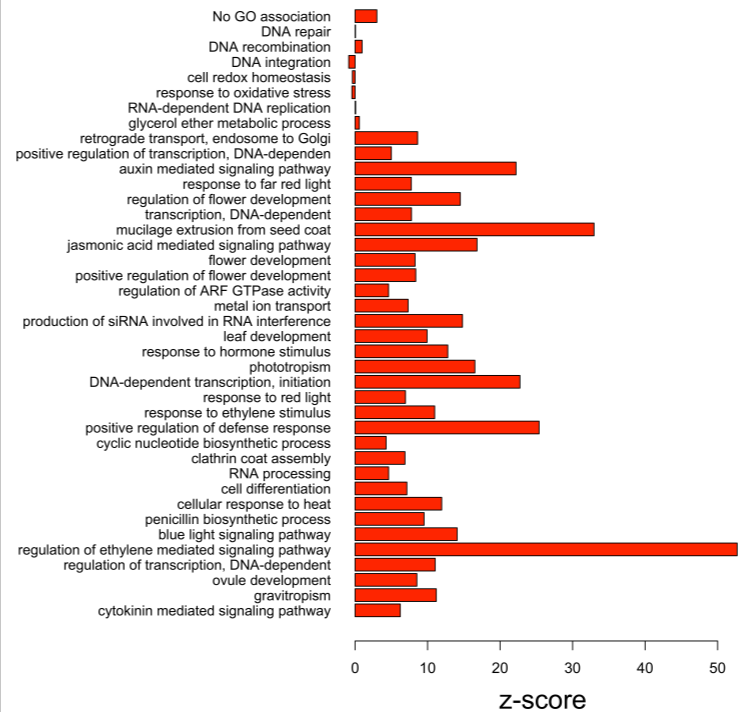

### Invertebrates

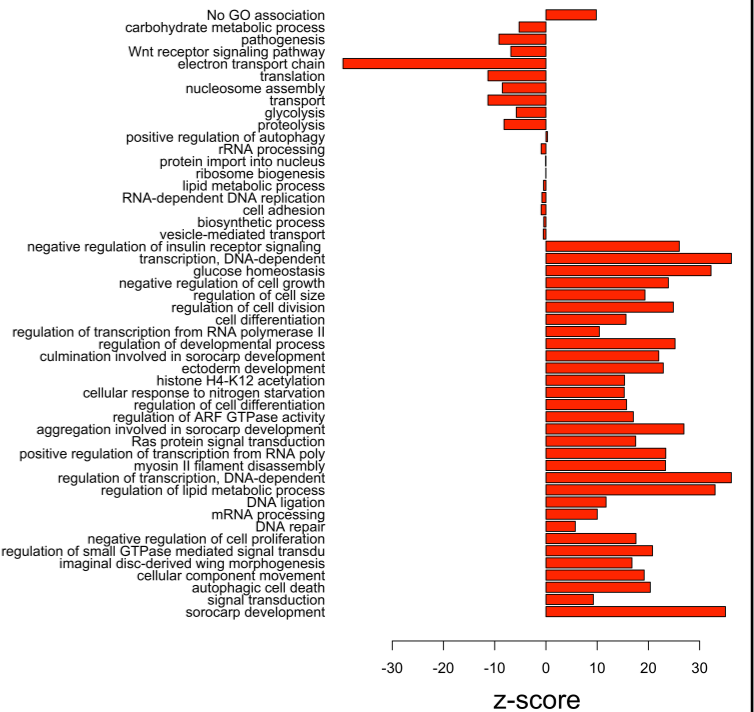

### Vertebrates

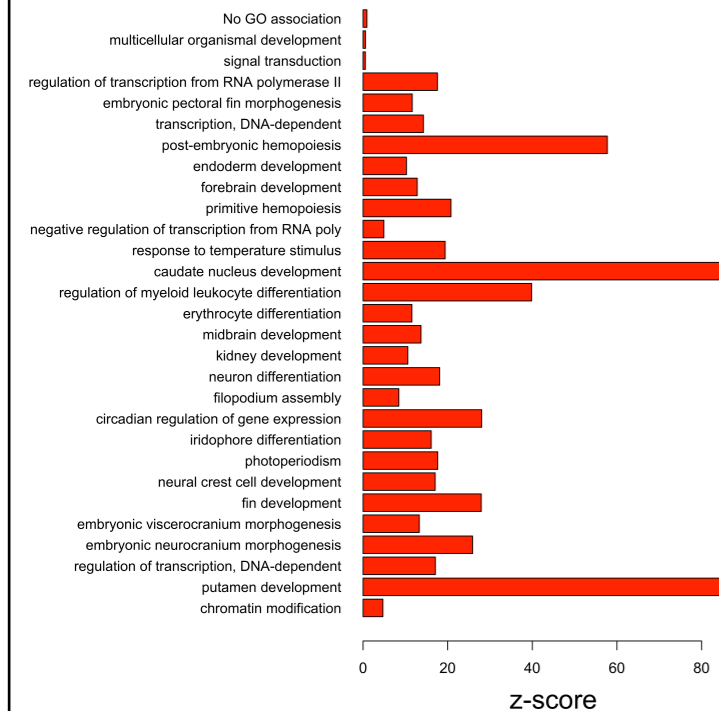

### Mammals

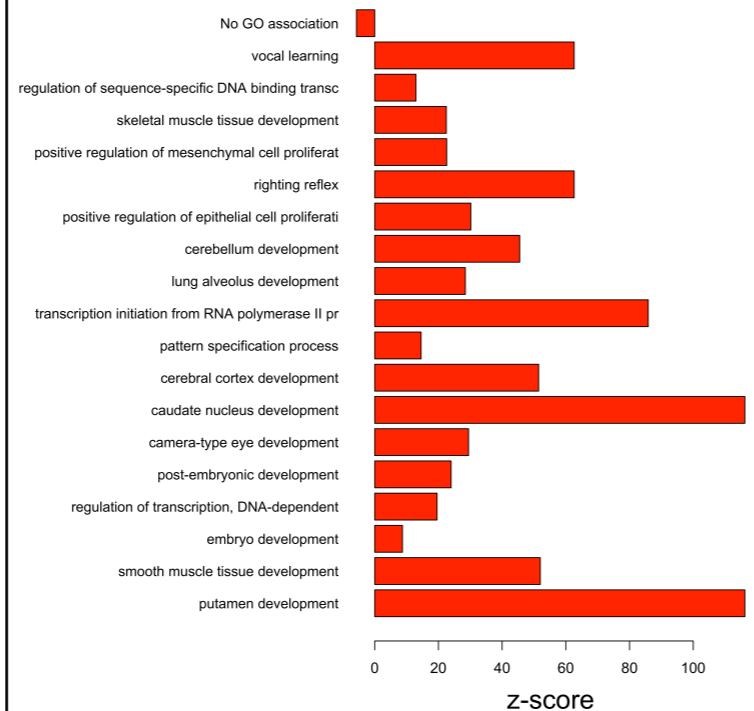

### Rodents

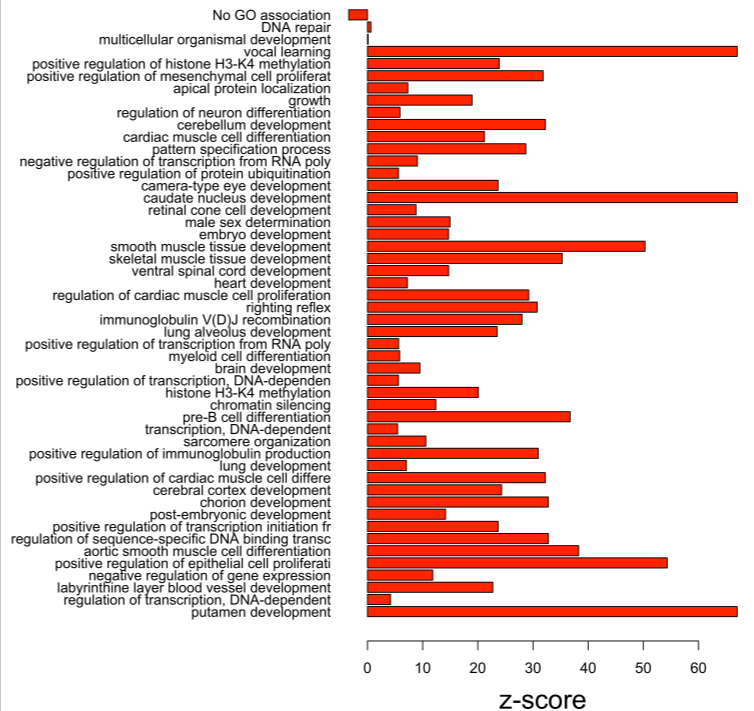

### Human

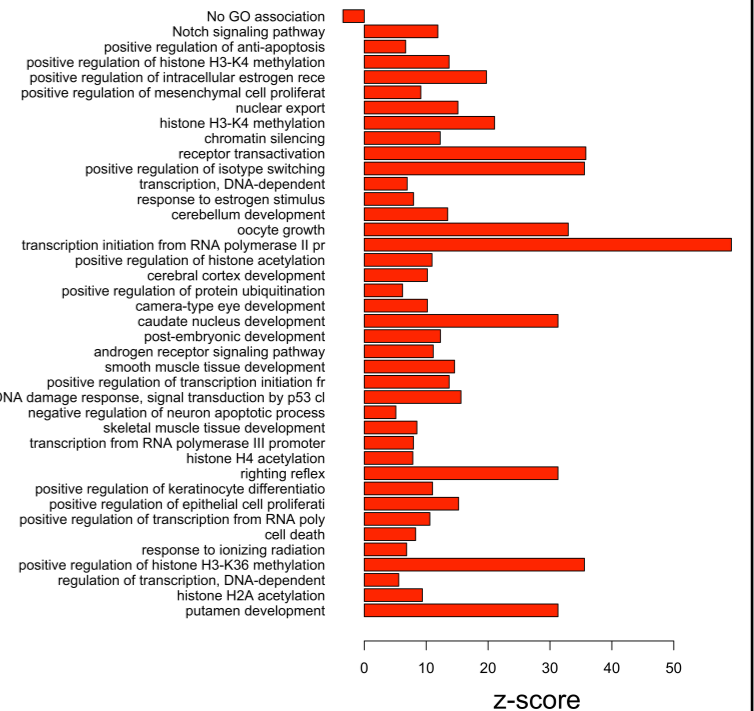

Supplement: 1471-2164-14-316-S11.pdf [file 1471-2164-14-316-S11.pdf]
