# Supplementary material for: Discovering putative prion sequences in complete proteomes using probabilistic representations of Q/N-rich domains
Source: BMC Genomics. 2013 May 10;14:316. doi: 10.1186/1471-2164-14-316 (PMC3654983; doi:10.1186/1471-2164-14-316)
Supplement: Additional file 2 — Prion-forming domain predictions in Bacteria. [file 1471-2164-14-316-S2.pdf]

|                                                     |                                   |  |         |         |                                                                 |
|-----------------------------------------------------|-----------------------------------|--|---------|---------|-----------------------------------------------------------------|
| >2K597 LISMO                                        | Window Position=307; Score=66.246 |  | Prion   | Domain: | STNTNANKTNTNTNTNTNTNTNTNTNTNTPSKNTNTNSNTNTNTNSNTNANQGSSNNNSN    |
| >Lactobacillus coleohominis 101-4-CHN: Total=2      |                                   |  |         |         |                                                                 |
| >C7XKPE 91AC0                                       | Window Position=172; Score=81.127 |  | Prion   | Domain: | GNVQTGNQSNASQNTNNDNQSNNTQQQNSQSSGNQANTNNGSSNNNGGQSNTSTNNGTQDQ   |
| >C7XKJ4 91AC0                                       | Window Position=106; Score=62.470 |  | Prion   | Domain: | SSNQSGNNQGGYNQNNNGGFWNNNQFSSQNAFNNNNGGFSNNNPAQPAANNQPVFNQDQ     |
| >Desulfosporosinus meridiei DSM 13257: Total=1      |                                   |  |         |         |                                                                 |
| >G6GBD5 9F1RM                                       | Window Position=120; Score=66.983 |  | Prion   | Domain: | QMNNFIEQAQQQLLNMSNQNNQQQGGQSQTQTSFGQQGQNQLQSGSGGGGQQMQHGGQ      |
| >Lactobacillus gasseri JV-V03: Total=5              |                                   |  |         |         |                                                                 |
| >D7V3G4 91AC0                                       | Window Position=731; Score=94.342 |  | Prion   | Domain: | SSQKQGSSTNNQNNNSNQNNQGGQQTENKDSQSSQSSQNTNNNNNQNNQQHGGNNSSNN     |
| >D7V5Q0 91AC0                                       | Window Position=223; Score=62.232 |  | Prion   | Domain: | SNSNSSSNTNTSSSSQSSNSNTANTQMSAASQSSSHATTNNSNNNSNSNTSSNSNSGN      |
| >D7V307 91AC0                                       | Window Position=148; Score=61.044 |  | Prion   | Domain: | QSSQSTQSGSTQSSYASASQTTTQGGTQGGTQSSQNTNNNNQNTNNNSSSSSSQAPSSY     |
| >D7V254 91AC0                                       | Window Position=274; Score=54.693 |  | Prion   | Domain: | RFTFSGQNSQTTSTTQSSASATTQSSTTTNNVNTQTQSGTQNTQGGTNTNNNGGQSNR      |
| >D7V3E8 91AC0                                       | Window Position=296; Score=56.320 |  | Prion   | Domain: | QQSSSSSQSKSEEHDAKQDSQNGNATQSGADNKSNNQGSQNTNTNNQCGNQNNQNT        |
| >Bacillus anthracis str. A0389: Total=1             |                                   |  |         |         |                                                                 |
| >B1EV04 BACAN                                       | Window Position=299; Score=70.686 |  | Prion   | Domain: | QQQNGNNGNQGNNGRSGQQGNNGNQGNNGQSGQNGNHQGGQENGRGSGQNGNQCGNNG      |
| >Vibrio cholerae HC-48B2: Total=1                   |                                   |  |         |         |                                                                 |
| >G7BPU1 VIBCH                                       | Window Position=440; Score=52.070 |  | Prion   | Domain: | QQQQQQQQQQQQQQQQQQQQQQQQQQQDSSSGASGQEAQEDSSANPSNTAQEQEASSQTKGAS |
| >Staphylococcus aureus A10102: Total=4              |                                   |  |         |         |                                                                 |
| >D1QH45 STAAU                                       | Window Position=55; Score=53.123  |  | Prion   | Domain: | NDNKQSTQNNHOKSNNQNNKNGQKQDNKKNQQQNNKGNKKNKNNKNNKNNKNNKPNQ       |
| >D1Q9M2 STAAU                                       | Window Position=400; Score=58.368 |  | Prion   | Domain: | NDQNNNAAQNNQAQNNQQQQAQNNQQQQQQQQQRGGQRHTVNGQENGLYRIAIIQYGGSGSP  |
| >D1Q1G2 STAAU                                       | Window Position=67; Score=64.857  |  | Prion   | Domain: | TQNTYTYNNYNTYTYNNYASNNYNNYSYQNNYNNNTSQTATNNYTLGSGASYSTTSSN      |
| >D1QFP5 STAAU                                       | Window Position=64; Score=77.992  |  | Prion   | Domain: | PSQLNQDNGYYSYYYYYNGYNNYNNYNGYSYNNYSRYNNYNNNQSYNNYNNYSYNTNSY     |
| >Enterococcus faecalis TX0309A: Total=1             |                                   |  |         |         |                                                                 |
| >E6GYX2 ENTFA                                       | Window Position=95; Score=80.869  |  | Prion   | Domain: | NNQSTNGQQRNNNNNRHQGSNTQNRNSGTNTNNNQNRNTQNNNGSTTNQNRTSQNNNGGN    |
| >Niabella soli DSM 19437: Total=1                   |                                   |  |         |         |                                                                 |
| >H1NJL7 9SPHI                                       | Window Position=306; Score=59.937 |  | Prion   | Domain: | NQQMQSQRQQQMDTRNQQMQRNQQAQRGQQMQSQRQQQMDMRNQMQRNQQAQRDQMQS      |
| >Corynebacterium kroppenstedtii: Total=3            |                                   |  |         |         |                                                                 |
| >C4LLR6 CORK4                                       | Window Position=539; Score=56.441 |  | Prion   | Domain: | GNNGNITGTDGNSGNTNTGNNSSNGTNNNGSGNAGNNGSRGNSNGSGGNTNNQNSAIN      |
| >C4LLM7 CORK4                                       | Window Position=88; Score=57.160  |  | Prion   | Domain: | AQQQYQGGYQQAQQAQGYGGYQAGYGTQSGQGFQPNQYTSYGGGTYDQQQYAGN          |
| >C4JH9 CORK4                                        | Window Position=603; Score=59.016 |  | Prion   | Domain: | NQQNSTNGNQNSGNNAGNSNGDMSDNGGANQDPTDSSNRGSGSGNSNSGNDNSGQMN       |
| >Staphylococcus aureus subsp. aureus 21194: Total=5 |                                   |  |         |         |                                                                 |
| >H0CBJ6 STAAU                                       | Window Position=58; Score=52.151  |  | Prion   | Domain: | SKDVNKNKDKNSANDNQCSNSNATNDNQDQNTNNNQSSNNQAANNQKSSSYVAPYQGNA     |
| >H0C953 STAAU                                       | Window Position=56; Score=50.002  |  | Prion   | Domain: | TNTNTNNQNNNNQNTGNGSSSTPTQNVNNGSTAPANTPSNPNQSSNSNSQSSSSNH        |
| >H0CBP3 STAAU                                       | Window Position=126; Score=58.368 |  | Prion   | Domain: | NDQNNNAAQNNQAQNNQQQQAQNNQQQQQQQRGGQRHTVNGQENGLYRIAIIQYGGSGSP    |
| >H0C8D5 STAAU                                       | Window Position=58; Score=52.601  |  | Prion   | Domain: | TGWNVPSQLTQNTTYTYNNYTYNNYASNNYNNYSYQNTATNNYTLGSGASYSTTSSNV      |
| >H0C509 STAAU                                       | Window Position=66; Score=80.329  |  | Prion   | Domain: | QLNQDNGYYSYYYYYNGYNNYNNYNNYNGYSYNNYSRYNNYNNNQSYNNYNNYSYNTNSY    |
| >Lactobacillus jensenii 27-2-CHN: Total=2           |                                   |  |         |         |                                                                 |
| >C7XZ12 91AC0                                       | Window Position=291; Score=51.019 |  | Prion   | Domain: | SNSGTTQSSYTYTYYSQSSSISTSSSVYTQSSQASSSQNTNTQNTNTQNTNTQNTNGT      |
| >C7XW3 91AC0                                        | Window Position=718; Score=55.497 |  | Prion   | Domain: | SSSSSSSSSGEDGSGTSSSSSSQSSGNNQGGTNTNTNNNTATGQGGNNNGGN            |
| >Staphylococcus epidermidis SK135: Total=4          |                                   |  |         |         |                                                                 |
| >D1WQ43 STAEF                                       | Window Position=106; Score=55.201 |  | Prion   | Domain: | NNKQKPNQKNTKNSDHPAQSTPQQSSQHHNQSDSQGQNSNNNNNNHGTNDGNNKNR        |
| >D1WLL9 STAEF                                       | Window Position=84; Score=60.215  |  | Prion   | Domain: | QNNKNSGSSSENQSTQKNSQNTQSTPRQNNNGNSQGNQASSGQNTQNTQNNNSQSSKDD     |
| >D1WN5 STAEF                                        | Window Position=373; Score=60.660 |  | Prion   | Domain: | SNDSSSNPNATSTNNNDVANNNSNTYNNQDQNNQNNQNNQQAQGGQSHVTYGGQENLY      |
| >D1WK28 STAEF                                       | Window Position=69; Score=69.946  |  | Prion   | Domain: | SYNNYNNYNNYTYGNNYSYNNYSYNNYSYNNYNNYQSNNTQSQRTQPTGGLGASYSTSSN    |
| >Leeuwenhoekella blandensis: Total=1                |                                   |  |         |         |                                                                 |
| >A3XJ9P LEEEM                                       | Window Position=138; Score=81.153 |  | Prion   | Domain: | SDNNRSKNRKRKDNNSNNNSNNNRKSDKNNSNNNNNSNSNRNNNRNNNNNNNNNGN        |
| >Xanthomonas perforans 91-118: Total=1              |                                   |  |         |         |                                                                 |
| >F0BXD8 9XANT                                       | Window Position=78; Score=92.125  |  | Prion   | Domain: | QQQQQRFNAQQQQQNNQGGQGGQGGQGGQNNQAGNQGGQGGGSGQGGQGGQGGQGN        |
| >Clostridium asparagiforme DSM 15981: Total=1       |                                   |  |         |         |                                                                 |
| >C0CWL3 9CLOT                                       | Window Position=15; Score=79.927  |  | Prion   | Domain: | SQNSRRNSQNSQNSQNSQNSQNSQNSRRNSQNSQNSRRNSQNSQNSRRNSQNSQNN        |
| >Enterococcus faecium: Total=2                      |                                   |  |         |         |                                                                 |
| >IF2_ENTFC                                          | Window Position=101; Score=71.702 |  | Prion</ |         |                                                                 |





[illegible]

[illegible]



[illegible]

|              |        |               |              |       |         |                                                                    |   |
|--------------|--------|---------------|--------------|-------|---------|--------------------------------------------------------------------|---|
| Q84D94.LISM0 | Window | Position=309; | Score=56.817 | Prior | Domain: | STNTNAKNTNTNTNTNTNTNTTPSKNTNTNTNTNTNTNTNTNTNTNTNTNTNAQGSNNNNNSASAI | I |
| Q84D72.LISM0 | Window | Position=309; | Score=55.516 | Prior | Domain: | STNTNAKNTNTNTNTNTNTNTTPSKNTNTNTNTNTNTNTNTNTNTNTNTNTNAQGSNNNNNSASAI | I |
| Q84D99.LISM0 | Window | Position=310; | Score=50.473 | Prior | Domain: | NTNAKNTNTNTNTNTNTNTTPSKNTNTNTNTNTNTNTNTNTNTNTNTNTNAQGSNNNNNSASAI   | I |
| Q84DL8.LISM0 | Window | Position=309; | Score=62.090 | Prior | Domain: | STNTNAKNTNTNTNTNTNTNTTPSKNTNTNTNTNTNTNTNTNTNTNTNTNTNAQGSNNNNNSASAI | I |
| Q84DN5.LISM0 | Window | Position=287; | Score=55.307 | Prior | Domain: | STNTNAKNTNTNTNTNTNTNTTPSKNTNTNTNTNTNTNTNTNTNTNTNTNTNAQGSNNNNNSASAI | I |
| Q84DM0.LISM0 | Window | Position=306; | Score=52.961 | Prior | Domain: | ASSTNTNAKNTNTNTNTNTNTTPSKNTNTNTNTNTNTNTNTNTNTNTNTNTNAQGSNNNNNSASAI | I |
| Q84DR9.LISM0 | Window | Position=288; | Score=56.817 | Prior | Domain: | STNTNAKNTNTNTNTNTNTNTTPSKNTNTNTNTNTNTNTNTNTNTNTNTNTNAQGSNNNNNSASAI | I |
| Q84DN2.LISM0 | Window | Position=310; | Score=50.473 | Prior | Domain: | NTNAKNTNTNTNTNTNTTPSKNTNTNTNTNTNTNTNTNTNTNTNTNTNAQGSNNNNNSASAI     | I |
| Q84D70.LISM0 | Window | Position=309; | Score=62.090 | Prior | Domain: | STNTNAKNTNTNTNTNTNTNTTPSKNTNTNTNTNTNTNTNTNTNTNTNTNTNAQGSNNNNNSASAI | I |
| Q84DP8.LISM0 | Window | Position=310; | Score=50.473 | Prior | Domain: | NTNAKNTNTNTNTNTNTTPSKNTNTNTNTNTNTNTNTNTNTNTNTNTNAQGSNNNNNSASAI     | I |
| Q86C17.LISM0 | Window | Position=37;  | Score=56.817 | Prior | Domain: | STNTNAKNTNTNTNTNTNTNTTPSKNTNTNTNTNTNTNTNTNTNTNTNTNTNAQGSNNNNNSASAI | I |
| G918E4.LISM0 | Window | Position=51;  | Score=50.473 | Prior | Domain: | NTNAKNTNTNTNTNTNTTPSKNTNTNTNTNTNTNTNTNTNTNTNTNTNAQGSNNNNNSASAI     | I |
| Q2WC8M.LISM0 | Window | Position=308; | Score=50.473 | Prior | Domain: | NTNAKNTNTNTNTNTNTTPSKNTNTNTNTNTNTNTNTNTNTNTNTNTNAQGSNNNNNSASAI     | I |
| Q84D51.LISM0 | Window | Position=271; | Score=60.843 | Prior | Domain: | STNTNAKNTNTNTNTNTNTTPSKNTNTNTNTNTNTNTNTNTNTNTNTNTNAQGSNNNNNSASAI   | I |
| Q84DP2.LISM0 | Window | Position=277; | Score=55.039 | Prior | Domain: | STNTNAKNTNTNTNTNTNTTPSKNTNTNTNTNTNTNTNTNTNTNTNTNTNAQGSNNNNNSASAI   | I |
| Q84DP3.LISM0 | Window | Position=308; | Score=55.039 | Prior | Domain: | STNTNAKNTNTNTNTNTNTTPSKNTNTNTNTNTNTNTNTNTNTNTNTNTNAQGSNNNNNSASAI   | I |
| Q84DQ6.LISM0 | Window | Position=278; | Score=64.168 | Prior | Domain: | STNTNAKNTNTNTNTNTNTNTTPSKNTNTNTNTNTNTNTNTNTNTNTNTNTNAQGSNNNNNSASAI | I |
| Q84D56.LISM0 | Window | Position=309; | Score=56.817 | Prior | Domain: | STNTNAKNTNTNTNTNTNTTPSKNTNTNTNTNTNTNTNTNTNTNTNTNTNAQGSNNNNNSASAI   | I |
| Q84DM9.LISM0 | Window | Position=289; | Score=50.473 | Prior | Domain: | NTNAKNTNTNTNTNTNTTPSKNTNTNTNTNTNTNTNTNTNTNTNTNTNAQGSNNNNNSASAI     | I |
| Q84DP6.LISM0 | Window | Position=310; | Score=50.849 | Prior | Domain: | NTNAKNTNTNTNTNTNTTPSKNTNTNTNTNTNTNTNTNTNTNTNTNTNAQGSNNNNNSASAI     | I |
| Q84DR0.LISM0 | Window | Position=288; | Score=66.246 | Prior | Domain: | STNTNAKNTNTNTNTNTNTNTTPSKNTNTNTNTNTNTNTNTNTNTNTNTNTNAQGSNNNNNSASAI | I |
| G61AV6.LISM0 | Window | Position=18;  | Score=64.168 | Prior | Domain: | STNTNAKNTNTNTNTNTNTNTTPSKNTNTNTNTNTNTNTNTNTNTNTNTNTNAQGSNNNNNSASAI | I |
| Q84DN3.LISM0 | Window | Position=310; | Score=52.251 | Prior | Domain: | NTNAKNTNTNTNTNTNTTPSKNTNTNTNTNTNTNTNTNTNTNTNTNTNAQGSNNNNNSASAI     | I |
| Q84DQ0.LISM0 | Window | Position=310; | Score=50.473 | Prior | Domain: | NTNAKNTNTNTNTNTNTTPSKNTNTNTNTNTNTNTNTNTNTNTNTNTNAQGSNNNNNSASAI     | I |
| Q83TQ3.LISM0 | Window | Position=310; | Score=50.473 | Prior | Domain: | NTNAKNTNTNTNTNTNTTPSKNTNTNTNTNTNTNTNTNTNTNTNTNTNAQGSNNNNNSASAI     | I |
| Q84DM5.LISM0 | Window | Position=310; | Score=50.473 | Prior | Domain: | NTNAKNTNTNTNTNTNTTPSKNTNTNTNTNTNTNTNTNTNTNTNTNTNAQGSNNNNNSASAI     | I |
| Q4TVQ4.LISM0 | Window | Position=309; | Score=52.251 | Prior | Domain: | NTNAKNTNTNTNTNTNTTPSKNTNTNTNTNTNTNTNTNTNTNTNTNTNAQGSNNNNNSASAI     | I |
| Q84MD3.LISM0 | Window | Position=309; | Score=62.090 | Prior | Domain: | STNTNAKNTNTNTNTNTNTTPSKNTNTNTNTNTNTNTNTNTNTNTNTNTNAQGSNNNNNSASAI   | I |
| Q84DQ7.LISM0 | Window | Position=309; | Score=64.168 | Prior | Domain: | STNTNAKNTNTNTNTNTNTNTTPSKNTNTNTNTNTNTNTNTNTNTNTNTNTNAQGSNNNNNSASAI | I |
| Q84DR3.LISM0 | Window | Position=273; | Score=68.024 | Prior | Domain: | NTNAKNTNTNTNTNTNTNTTPSKNTNTNTNTNTNTNTNTNTNTNTNTNTNAQGSNNNNNSASAI   | I |
| Q84MD2.LISM0 | Window | Position=308; | Score=52.628 | Prior | Domain: | STNTNAKNTNTNTNTNTNTNTTPSKNTNTNTNTNTNTNTNTNTNTNTNTNTNAQGSNNNNNSASAI | I |
| G86930.LISM0 | Window | Position=37;  | Score=66.246 | Prior | Domain: | STNTNAKNTNTNTNTNTNTNTTPSKNTNTNTNTNTNTNTNTNTNTNTNTNTNAQGSNNNNNSASAI | I |
| Q84D73.LISM0 | Window | Position=283; | Score=52.251 | Prior | Domain: | NTNAKNTNTNTNTNTNTTPSKNTNTNTNTNTNTNTNTNTNTNTNTNTNAQGSNNNNNSASAI     | I |
| Q57205.LISM0 | Window | Position=20;  | Score=50.473 | Prior | Domain: | NTNAKNTNTNTNTNTNTTPSKNTNTNTNTNTNTNTNTNTNTNTNTNTNAQGSNNNNNSASAI     | I |
| Q84DP0.LISM0 | Window | Position=308; | Score=51.960 | Prior | Domain: | STNTNAKNTNTNTNTNTNTTPSKNTNTNTNTNTNTNTNTNTNTNTNTNTNAQGSNNNNNSASAI   | I |
| Q84D59.LISM0 | Window | Position=309; | Score=62.090 | Prior | Domain: | STNTNAKNTNTNTNTNTNTTPSKNTNTNTNTNTNTNTNTNTNTNTNTNTNAQGSNNNNNSASAI   | I |
| Q84DR6.LISM0 | Window | Position=309; | Score=58.350 | Prior | Domain: | STNTNAKNTNTNTNTNTNTTPSKNTNTNTNTNTNTNTNTNTNTNTNTNTNAQGSNNNNNSASAI   | I |
| Q84782.LISM0 | Window | Position=18;  | Score=56.817 | Prior | Domain: | STNTNAKNTNTNTNTNTNTTPSKNTNTNTNTNTNTNTNTNTNTNTNTNTNAQGSNNNNNSASAI   | I |
| Q84DP1.LISM0 | Window | Position=310; | Score=50.473 | Prior | Domain: | NTNAKNTNTNTNTNTNTTPSKNTNTNTNTNTNTNTNTNTNTNTNTNTNAQGSNNNNNSASAI     | I |
| Q84775.LISM0 | Window | Position=18;  | Score=55.039 | Prior | Domain: | STNTNAKNTNTNTNTNTNTTPSKNTNTNTNTNTNTNTNTNTNTNTNTNTNAQGSNNNNNSASAI   | I |
| Q84D57.LISM0 | Window | Position=311; | Score=52.251 |       |         |                                                                    |   |

[illegible]







[illegible]





[illegible]



[illegible]









[illegible]

[illegible]
