# Supplementary material for: Discovering putative prion sequences in complete proteomes using probabilistic representations of Q/N-rich domains
Source: BMC Genomics. 2013 May 10;14:316. doi: 10.1186/1471-2164-14-316 (PMC3654983; doi:10.1186/1471-2164-14-316)
Supplement: Additional file 4 — Prion-forming domain predictions in Fungi. [file 1471-2164-14-316-S4.pdf]

[illegible]







[illegible]































[illegible]









[illegible]
