# Supplementary material for: Discovering putative prion sequences in complete proteomes using probabilistic representations of Q/N-rich domains
Source: BMC Genomics. 2013 May 10;14:316. doi: 10.1186/1471-2164-14-316 (PMC3654983; doi:10.1186/1471-2164-14-316)
Supplement: Additional file 5 — Prion-forming domain predictions in Invertebrates. [file 1471-2164-14-316-S5.pdf]

[illegible]

[illegible]





[illegible]

[illegible]

[illegible]

[illegible]





[illegible]

[illegible]



[illegible]

[illegible]

[illegible]

[illegible]

[illegible]

[illegible]

[illegible]



[illegible]

[illegible]

[illegible]



[illegible]







[illegible]

[illegible]

|              |        |                |               |       |         |                                  |                              |
|--------------|--------|----------------|---------------|-------|---------|----------------------------------|------------------------------|
| F4P2M7.DICFS | Window | Position:349;  | Score=65.91   | Prion | Domain: | MSXGKGNVITNTGNNLLSVLSGLNRLMSTLS  | XXXXXXXXXXXXXXXXXXXXXXXXXXXX |
| F4P2M7.DICFS | Window | Position:213;  | Score=60.893  | Prion | Domain: | MLMYIFISFNPLMLNGLSVSLQMLDTPNNNGV | FRSISYFQQQQQXXXXXXXXXXSTTFNQ |
| F4P612.DICFS | Window | Position:113;  | Score=58.843  | Prion | Domain: | NHTQNTNNNPISATTTTATVSDVGRDNNNTAT | TTTNNNNNNNNNNNNNNNNNNNNNN    |
| F4PWN4.DICFS | Window | Position:272;  | Score=59.674  | Prion | Domain: | NHFNQNNNNNNNNNNNNNNNNNNNNNNNNNN  | NNNNNNNNNNNNNNNNNNNNNNNNNN   |
| F4Q3C0.DICFS | Window | Position:275;  | Score=51.075  | Prion | Domain: | QOQNNFQMLQGGQIAQLTTLNLHQLIQVQQL  | HLQPHLQOQNNNNNNNNNNNNNNNNNN  |
| F4FPD3.DICFS | Window | Position:898;  | Score=91.774  | Prion | Domain: | GMSTKTLQNNNNNNNNNNNNNNNNNNNNNN   | NNNNNNNNNNNNNNNNNNNNNNNNNN   |
| F4PQK0.DICFS | Window | Position:463;  | Score=98.652  | Prion | Domain: | GSQNNNNNNNNNNNNNNNNNNNNNNNNNN    | NNNNNNNNNNNNNNNNNNNNNNNNNN   |
| F4QEA9.DICFS | Window | Position:372;  | Score=59.795  | Prion | Domain: | SDQNLLDFNNNNNNNNNNNNNNNNNNNNNN   | NNNNNNNNNNNNNNNNNNNNNNNNNN   |
| F4Q157.DICFS | Window | Position:428;  | Score=61.545  | Prion | Domain: | KYNNQKFFDNNNNNNNNNNNNNNNNNNNN    | NNNNNNNNNNNNNNNNNNNNNNNNNN   |
| F4P2M7.DICFS | Window | Position:482;  | Score=62.821  | Prion | Domain: | NNNNNNNNNNNNNNNNNNNNNNNNNNNN     | NNNNNNNNNNNNNNNNNNNNNNNNNN   |
| F4Q6V3.DICFS | Window | Position:488;  | Score=61.098  | Prion | Domain: | NNNNNNNNNNNNNNNNNNNNNNNNNNNN     | NNNNNNNNNNNNNNNNNNNNNNNNNN   |
| F4QBA0.DICFS | Window | Position:131;  | Score=85.065  | Prion | Domain: | QNNNNNNNNNNNNNNNNNNNNNNNNNNNN    | NNNNNNNNNNNNNNNNNNNNNNNNNN   |
| F4PWN9.DICFS | Window | Position:422;  | Score=74.943  | Prion | Domain: | NNLLKLNNNNNNNNNNNNNNNNNNNNNNNN   | NNNNNNNNNNNNNNNNNNNNNNNNNN   |
| F4P5G2.DICFS | Window | Position:1126; | Score=111.299 | Prion | Domain: | QOQMDINLNLLATNNNNNNNNNNNNNNNN    | NNNNNNNNNNNNNNNNNNNNNNNNNN   |
| F4P074.DICFS | Window | Position:312;  | Score=51.563  | Prion | Domain: | QOHLQOQOQOQOYESQNNNNNNNNNNNN     | NNNNNNNNNNNNNNNNNNNNNNNNNN   |
| F4Q3C2.DICFS | Window | Position:94;   | Score=61.481  | Prion | Domain: | NRXNLLQOQOQOQOQOQOQOQOQOQOQ      | QOQOQOQOQOQOQOQOQOQOQOQOQ    |
| F4Q544.DICFS | Window | Position:386;  | Score=50.187  | Prion | Domain: | FPAAKNTNNNTNNNSKQDNNNTTNNNNNT    | TTTTNTNNNTTNNNTNNNTNNNTNNNT  |
| F4P2P6.DICFS | Window | Position:103;  | Score=53.754  | Prion | Domain: | NNNNNNNNNNNNNNNNNNNNNNNNNNNN     | NNNNNNNNNNNNNNNNNNNNNNNNNN   |
| F4PMM7.DICFS | Window | Position:145;  | Score=52.386  | Prion | Domain: | NNNNNNNNNNNNNNNNNNNNNNNNNNNN     | NNNNNNNNNNNNNNNNNNNNNNNNNN   |
| F4K19.DICFS  | Window | Position:164;  | Score=85.825  | Prion | Domain: | NNNNNNNNNNNNNNNNNNNNNNNNNNNN     | NNNNNNNNNNNNNNNNNNNNNNNNNN   |
| F4P2M7.DICFS | Window | Position:493;  | Score=51.581  | Prion | Domain: | QOHLQOQOQOQOQOQOQOQOQOQOQOQ      | QOQOQOQOQOQOQOQOQOQOQOQOQ    |
| F4PMM0.DICFS | Window | Position:493;  | Score=54.580  | Prion | Domain: | GSVNNNNNNNNNNNNNNNNNNNNNNNNNN    | NNNNNNNNNNNNNNNNNNNNNNNNNN   |
| F4PWA3.DICFS | Window | Position:557;  | Score=74.399  | Prion | Domain: | NNNNNNNNNNNNNNNNNNNNNNNNNNNN     | NNNNNNNNNNNNNNNNNNNNNNNNNN   |
| F4S5G0.DICFS | Window | Position:289;  | Score=100.954 | Prion | Domain: | LQOQOQNNNNNNNNNNNNNNNNNNNNNN     | NNNNNNNNNNNNNNNNNNNNNNNNNN   |
| F4W0D8.DICFS | Window | Position:414;  | Score=54.055  | Prion | Domain: | NNNNNNNNNNNNNNNNNNNNNNNNNNNN     | NNNNNNNNNNNNNNNNNNNNNNNNNN   |
| F4P6G9.DICFS | Window | Position:487;  | Score=68.029  | Prion | Domain: | NNNNNNNNNNNNNNNNNNNNNNNNNNNN     | NNNNNNNNNNNNNNNNNNNNNNNNNN   |
| F4PVA3.DICFS | Window | Position:646;  | Score=146.266 | Prion | Domain: | NNNNNNNNNNNNNNNNNNNNNNNNNNNN     | NNNNNNNNNNNNNNNNNNNNNNNNNN   |
| F4PKH3.DICFS | Window | Position:1533; | Score=65.952  | Prion | Domain: | GGSSDIQPOQOQOQOQOQOQOQOQOQOQ     | QOQOQOQOQOQOQOQOQOQOQOQOQ    |
| F4T13.DICFS  | Window | Position:87;   | Score=61.736  | Prion | Domain: | KSNQSGGSGSGSGSGSTSTTNNNNNNNN     | NNNNNNNNNNNNNNNNNNNNNNNNNN   |
| F4PIP7.DICFS | Window | Position:242;  | Score=68.900  | Prion | Domain: | LNKILKFSILINQAAANNNNNNNNNNNN     | NNNNNNNNNNNNNNNNNNNNNNNNNN   |
| F4PUQ2.DICFS | Window | Position:6;    | Score=75.953  | Prion | Domain: | QOQOQOQOQOQOQOQOQOQOQOQOQOQ      | QOQOQOQOQOQOQOQOQOQOQOQOQ    |
| F4PML9.DICFS | Window | Position:1295; | Score=77.666  | Prion | Domain: | HQOQHQHGHGHGHGHGHGHGHGHGHGH      | GHGHGHGHGHGHGHGHGHGHGHGHGH   |
| F4P2M7.DICFS | Window | Position:439;  | Score=80.991  | Prion | Domain: | QOQOQOQOQOQOQOQOQOQOQOQOQOQ      | QOQOQOQOQOQOQOQOQOQOQOQOQ    |
| F4PU37.DICFS | Window | Position:164;  | Score=76.890  | Prion | Domain: | LNQNNQNTTISNNNNNTNNFNQNNQYNN     | QNNNNQNNQNNQNTTTPKQOQYQWGN   |
| F4QDK3.DICFS | Window | Position:367;  | Score=63.245  | Prion | Domain: | QOQOQOQOQOQNNQFGQFQSGSLISQSP     | PPFFMTFQOQOQOQOQOQOQOQOQOQ   |
| F4PV34.DICFS | Window | Position:309;  | Score=75.683  | Prion | Domain: | NDFNNNNNNNNNNNNNNNNNNNNNNNNNN    | NNNNNNNNNNNNNNNNNNNNNNNNNN   |
| F4P1N9.DICFS | Window | Position:707;  | Score=85.311  | Prion | Domain: | NGNNNNNNNNNNNNNNNNNNNNNNNNNN     | NNNNNNNNNNNNNNNNNNNNNNNNNN   |
| F4PI12.DICFS | Window | Position:118;  | Score=53.924  | Prion | Domain: | SQSFNNNNNSGDTMTNLVNGNNGSGSG      | SGSGSGSGSGSGSGSGSGSGSGSGSG   |
| F4PTE1.DICFS | Window | Position:574;  | Score=82.906  | Prion | Domain: | KPFNNNTNSGQGLLYLNNNNNNHLPNNH     | INNNOQNNNNNNNNNNNNNNNNNNNN   |
| F4PQ90.DICFS | Window | Position:168;  | Score=60.126  | Prion | Domain: | YQSGSGGGYGGYGGYGGYGGYGGYGGY      | GGYGGYGGYGGYGGYGGYGGYGGYGG   |
| F4PFP5.DICFS | Window | Position:432;  | Score=88.776  |       |         |                                  |                              |

[illegible]

[illegible]

[illegible]





[illegible]

[illegible]

[illegible]

[illegible]

[illegible]

[illegible]

[illegible]



[illegible]

[illegible]

[illegible]



[illegible]



[illegible]

[illegible]









[illegible]







[illegible]









[illegible]



[illegible]

[illegible]







AN023\_ANOGA Window Position=7; Score=66.358 | Prion Domain: FLIAA9SAASLQYHQHQQSQQQHQQLQQQLPQCCQQQLQQQQQQQQQQQQQQQQND

>Trypanosoma cruzi: Total=15

Q4D6H3\_TRYCC Window Position=1634; Score=50.211 | Prion Domain: QQQQQQQQQQQQQQQQQANSSSTATTQQQQQQQSHSHQHQQQQQQQQHQQRPEGATATAAG

Q4DKL7\_TRYCC Window Position=118; Score=55.948 | Prion Domain: RKRCAATQYVHFTELEKLESVYNNNNNNNNNNNNNNNNNNNNNNNNNNNNNNNNNNNNNN

Q4DDU1\_TRYCC Window Position=412; Score=55.117 | Prion Domain: QQQAQAAAAQQQQQQQQQQQQQQQLQAMMYQSPQAQSQHQYVQSPQOPQOPQOPQQQQQQQ

Q4QCU5\_TRYCC Window Position=484; Score=50.435 | Prion Domain: PVNSHARATMSRSGSIRNNNDNNNNNNNNNNNNNNNNNNNNNNNNNNNNNNNNNNNNNN

Q4DKZ8\_TRYCC Window Position=2408; Score=64.259 | Prion Domain: MMLDHFQELNDGETGNNNNNNNNNNNNNNNNNNNNNNNNNNNNNNNNNNNNNNNNNNNNNN

Q4DAC8\_TRYCC Window Position=239; Score=52.416 | Prion Domain: QYNYQHQNYYHHHHYCNQSPYQYQSQGHYQAQYVHFHHHHHHKQKQJQJQPOQQQQ

Q4DJ77\_TRYCC Window Position=915; Score=75.665 | Prion Domain: STDEASGGGAGVYGVNNNSNNNNNNNNNNNNNNNNNNNNNNNNNNNNNNNNNNNNNNNNNNNN

E7KAZ6\_TRYCC Window Position=314; Score=52.289 | Prion Domain: QQQQQQQQQQQQQQQQQHQYVHFHHHHHHHHHHHHHHHHHHHHHHHHHHHHHHHHHHHHHH

E7LSD5\_TRYCC Window Position=233; Score=55.195 | Prion Domain: L5QQQQQQQQQQQQQQQQQQQQQQQQQQQQQQQQQQQQQQQQQQQQQQQQQQQQQQQQQQQQQQ

E7DAD4\_TRYCC Window Position=314; Score=55.987 | Prion Domain: QQQQQQQQQQQQQQQQQQQQQQQQQQQQQQQQQQQQQQQQQQQQQQQQQQQQQQQQQQQQQQQ

Q4DQ88\_TRYCC Window Position=924; Score=66.848 | Prion Domain: FANSRKDRVTEASGCGAGVYGVNNNSNNNNNNNNNNNNNNNNNNNNNNNNNNNNNNNNNNNN

Q4DZW2\_TRYCC Window Position=83; Score=57.908 | Prion Domain: QQQQQQQQQQQQQQQQQQQQQQQQQQQQQQQQQQQQQQQQQQQQQQQQQQQQQQQQQQQQQQQ

E7L7Y2\_TRYCC Window Position=241; Score=50.011 | Prion Domain: NYNNQYHHYHHHHYNNQSPYQYQSQGHYQAQYVHFHHHHHHKQKQJQJQPOQQQQ

E7LWML\_TRYCC Window Position=1637; Score=64.217 | Prion Domain: QQQQQQQQQQQQQQQQQQQQQQQQQQQQQQQQQQQQQQQQQQQQQQQQQQQQQQQQQQQQQQQ

Q4DYN5\_TRYCC Window Position=644; Score=57.792 | Prion Domain: QQQAQGSAQSLQNYASQAQQAQSQQAQSLQNYASQAQQAQSQQAQSQPQNYASQAQQAQSQ

>Polysphondylium pallidum: Total=775

D3BK93\_POLPA Window Position=155; Score=54.317 | Prion Domain: NNNNNNNNNNNNNSSINNNSNSNNGNIGKGTYSINRTTTTAAPTTTTNSNFQKTT

D3BT0E\_POLPA Window Position=256; Score=75.276 | Prion Domain: QQQQQQQQQQQQLQLHLQQLQQQQQLQQQQLFGSQSQSQQQQQQQQQQQQQQQQQQQQQQQQQ

D3BCB7\_POLPA Window Position=664; Score=74.283 | Prion Domain: NNNNNNNNNNNNNSSSSNNNNNNNNNNNNNNNNNNNNNNNNNNNNNNNNNNNNNNNNNNNNNN

D3BQ13\_POLPA Window Position=72; Score=61.942 | Prion Domain: QYGNQYNNNNNNNNNNNNNNNNNNNNNNNNNNNNNNNNNNNNNNNNNNNNNNNNNNNNNNNNNN

D3BQ13\_POLPA Window Position=144; Score=71.565 | Prion Domain: QYGNQYNNNNNNNNNNNNNNNNNNNNNNNNNNNNNNNNNNNNNNNNNNNNNNNNNNNNNNNNNN

D3BSQ2\_POLPA Window Position=264; Score=66.982 | Prion Domain: VNMSYDERDLRDSRNNNNNNNNNNNNNTPTNYVMSQSYRNNNSYNNNNNNNNNNNNNNNN

D3BFL1\_POLPA Window Position=283; Score=103.333 | Prion Domain: QRQQLHLQLQQLQQQQQQQQQQQQQQQQQQQQQQQQQQQQQQQQQQQQQQQQQQQQQQQQQQ

D3AWL5\_POLPA Window Position=95; Score=58.592 | Prion Domain: NNSNSNNSNNNSHSSSSISLDSNNSNNNNNNNNNNNNNNNNNNNNNNNNNNNNNNNNNNNN

D3AWN6\_POLPA Window Position=402; Score=59.972 | Prion Domain: NGYNSYNSYNSGYSYNNNGNSNSDGYNSNNNSNNNSRAGSGMGNNGNSNNNSNNNSSSSS

D3B838\_POLPA Window Position=458; Score=60.661 | Prion Domain: NNNNNNNNNNNNSLSTNNNNNNNNNNNNNNNNNNNNNNNNNNNNNNNNNNNNNNNNNNNNNN

D3AC92\_POLPA Window Position=950; Score=94.858 | Prion Domain: QSSSSTISNNNSINNNNNNNNNNNNNNNNNNNNNNNNNNNNNNNNNNNNNNNNNNNNNNNNNN

D3B1AL\_POLPA Window Position=1; Score=74.857 | Prion Domain: NMMNNNNNNNNNNNNNNNNNNNNNNNNNNNNNNNNNNNNNNNNNNNNNNNNNNNNNNNNNNNN

D3AW68\_POLPA Window Position=54; Score=57.786 | Prion Domain: SFNLDSNNNNNNNNNNNNNNNNNNNNNNNNNNNNNNNNNNNNNNNNNNNNNNNNNNNNNNNNNN

D3BQ85\_POLPA Window Position=721; Score=102.113 | Prion Domain: NMMNNNNNNNNNNNNNNNNNNNNNNNNNNNNNNNNNNNNNNNNNNNNNNNNNNNNNNNNNNNN

D3BQ13\_POLPA Window Position=72; Score=61.942 | Prion Domain: QYGNQYNNNNNNNNNNNNNNNNNNNNNNNNNNNNNNNNNNNNNNNNNNNNNNNNNNNNNNNNNN

D3AX08\_POLPA Window Position=654; Score=74.724 | Prion Domain: GYNGVNTPLMNNNNNNNNNNNNNNNNNNNNNNNNNNNNNNNNNNNNNNNNNNNNNNNNNNNN

D3BT0E\_POLPA Window Position=119; Score=52.344 | Prion Domain: NVNYSAPKPLCSTNNHNSHVNMBKNNYNNNNNTQYNNNNNNNNNNNNNNNNNNNNNNNNNNNN

D3BB32\_POLPA Window Position=199; Score=85.193 | Prion Domain: NNNNNNNNNNNNNNNNNNNNNNNNNNNNNNNNNNNNNNNNNNNNNNNNNNNNNNNNNNNNNNN

D3B811\_POLPA Window Position=222; Score=59.065 | Prion Domain: QLLNNNSSTNSGASISNNNSNNNSNGSSISGSSNNNSNNNGKNCISNGVNGSSIS

D3B600\_POLPA Window Position=268; Score=78.916 | Prion Domain: NNNNNNNNNNNNTQNTLVSPPTIYRVHSNNNNNTPTFNNNNNNNNNNNNNNNNNNNNNNNNNN

D3B746\_POLPA Window Position=373; Score=74.845 | Prion Domain: NNNNNNNNNNNNNNNNNNNNNNNNNNNNNNNNNNNNNNNNNNNNNNNNNNNNNNNNNNNNNNN

D3AVU2\_POLPA Window Position=186; Score=86.846 | Prion Domain: QQQQYVNNNNNNNNNNNNNNNNNNNNNNNNNNNNNNNNNNNNNNNNNNNNNNNNNNNNNNNNNN

D3B96\_POLPA Window Position=2; Score=72.564 | Prion Domain: NNNNNNNNSINTIDNNNNNNNNNNNNNNNNNNNNNNNNNNNNNNNNNNNNNNNNNNNNNNNNNN

D3BK94\_POLPA Window Position=2; Score=56.171 | Prion Domain: NKKNNNNNNNNNNNNNNNNNNNNNNNNNNNNNNNNNNNNNNNNNNNNNNNNNNNNNNNNNNNN

D3AZN8\_POLPA Window Position=241; Score=62.258 | Prion Domain: QQQQLQQQLQQLQQQQQQQQQLQLQQQQQLDPLSLKDLDDNNNNNNNNNNNNNNNNNNNNNN

D3B7T3\_POLPA Window Position=700; Score=75.546 | Prion Domain: VQNAITTTTNNNNNNNNNNNNNNNNNNNNNNNNNNNNNNNNNNNNNNNNNNNNNNNNNNNNNN

D3B7T3\_POLPA Window Position=524; Score=60.661 | Prion Domain: QYGNQYNNNNNNNNNNNNNNNNNNNNNNNNNNNNNNNNNNNNNNNNNNNNNNNNNNNNNNNNNN

D3B9U9\_POLPA Window Position=792; Score=51.479 | Prion Domain: NVMSGSLSTTPTI.NNNNNNNNNNNNNNNNNNNNNNNNNNNNNNNNNNNNNNNNNNNNNNNNN

D3BNA2\_POLPA Window Position=356; Score=74.090 | Prion Domain: TTTNNNNNNNNNNNNNNNNNNNNNNNNNNNNNNNNNNNNNNNNNNNNNNNNNNNNNNNNNNNN

D3B134\_POLPA Window Position=1026; Score=50.622 | Prion Domain: NNNNNNNNNNNNNNNNNNNNNNNNNNNNNNNNNNNNNNNNNNNNNNNNNNNNNNNNNNNNNNN

D3BB85\_POLPA Window Position=58; Score=78.897 | Prion Domain: QQQQKLKNNNNNNNNNNNNNNNNNNNNNNNNNNNNNNNNNNNNNNNNNNNNNNNNNNNNNNNN

D3B111\_POLPA Window Position=127; Score=51.429 | Prion Domain: NNNNNNNNNNNNELANRSNFRNNKNNNNNNNNNNNNNNNNNNNNNNNNNNNNNNNNNNNNNN

D3BFH4\_POLPA Window Position=331; Score=51.221 | Prion Domain: NESISNTLHSGDSISYNNHISNNNNNNNNNNNNNNNNNNNNNNNNNNNNNNNNNNNNNNNN

D3BMT6\_POLPA Window Position=225; Score=54.756 | Prion Domain: NNTTNTNNNNNNNNNNNNNNNNNNNNNNNNNNNNNNNNNNNNNNNNNNNNNNNNNNNNNNNNNN

D3BC64\_POLPA Window Position=221; Score=55.990 | Prion Domain: NNNNNNNNNNNNNNNNNNNNNNNNNNNNNNNNNNNNNNNNNNNNNNNNNNNNNNNNNNNNNNN

D3B2U4\_POLPA Window Position=45; Score=58.172 | Prion Domain: YSYKELFSKQJHQHQQQQQQQQQQQQQQQQQQQQQQQQQQQQQQQQQQQQQQQQQQQQQQQQQ

D3B2U4\_POLPA Window Position=129; Score=55.925 | Prion Domain: SQGTQGGQQQQQQQQQQQQQQQQQQQQQQQQQQQQQQQQQQQQQQQQQQQQQQQQQQQQQQQQ

D3BC84\_POLPA Window Position=4; Score=60.733 | Prion Domain: NKKNNNNNNNNNNNNNNNNNNNNNNNNNNNNNNNNNNNNNNNNNNNNNNNNNNNNNNNNNNNN

D3BK93\_POLPA Window Position=721; Score=91.537 | Prion Domain: NNNNNNNNNNNNNNNNNNNNNNNNNNNNNNNNNNNNNNNNNNNNNNNNNNNNNNNNNNNNNNN

D3BFN2\_POLPA Window Position=635; Score=63.257 | Prion Domain: NNNNNNNNNNTSPNNNNNNNNNNNNNNNNNNNNNNNNNNNNNNNNNNNNNNNNNNNNNNNNNN

D3B1T1\_POLPA Window Position=453; Score=62.507 | Prion Domain: QQQTPTVQQQQQQQQQQQQQQQQQQQQQQQQQQQQQQQQQQQQQQQQQQQQQQQQQQQQQQQQ

D3B431\_POLPA Window Position=345; Score=51.672 | Prion Domain: AYQNIQNNKMYHPPQMLQQSQREDQQQQQQQQQQQQQQQQQQQQQQQQQQQQQQQQQQQQQQ

D3BMC5\_POLPA Window Position=248; Score=60.438 | Prion Domain: NNSHSSNNKSLTSLNSQYNNNSNTYNSQSQYVNTPTIPIFQQQQQQQQQQQQQQQQQQQQQQ

D3AYD0\_POLPA Window Position=643; Score=52.476 | Prion Domain: TMSHILQQLQQLQQQQQQQQQQQQNNNTYNTQQYQQQQQQQQQQQQQQQQQQQQQQQQQQQQ

D3BDY5\_POLPA Window Position=71; Score=59.316 | Prion Domain: NNNNNNNNTSYNQFDEQKSTRTKTHNNNNNNNNNNNNNNNNNNNNNNNNNNNNNNNNNNNNNN

D3B8A1\_POLPA Window Position=107; Score=61.520 | Prion Domain: DNNNNNTSYNQFDEQKSTRTKTHNN

[illegible]

[illegible]

[illegible]





[illegible]

[illegible]





[illegible]

[illegible]











[illegible]



B4QWKS\_DROST Window Position:347; Score=52.218 | Prion Domain: SSSSSSSSSSVHSSNNNNMLQQLSQCVNTYVAHSSQQLQQQQHQQHSHQQHQQHSS

B4QVKT\_DROST Window Position:10; Score=57.650 | Prion Domain: QNNSSQLQLQEQQHQLQQQQHQLQLQQLPQRRQTYKEYLHQHQHQKQQQQQLQQQQNN

B4R264\_DROST Window Position:84; Score=56.045 | Prion Domain: HQGGQQLHQHQHQHQHQHQHQHQQLLPAGLVNGSGSGNNMVANLHQLHQHQHQHQHQHQHQHQ

F6JKBE\_DROST Window Position:3; Score=55.517 | Prion Domain: NAEQMGALLNQQLQTTAINGSTSSSSSSSGNNNNNNNNNNNTTTTNTTNTGNSAKFYLR

B4R761\_DROST Window Position:2030; Score=70.396 | Prion Domain: CNFQQQQQQQQQQQQQQQQQQQQQQQQQQQQQQQQQQQQQQQQQQQQQQQQQQQQQQQQQQQQQQ

E6ZD37\_DROST Window Position:2; Score=52.858 | Prion Domain: MGALLNLQQLQTTAINGSTSSSSSSSGNNNNNNNNNNNTTTTNTTNTGNSAKFYLR

B4QYXS\_DROST Window Position:510; Score=59.746 | Prion Domain: TTSSTYQQLQLSHNNNNSSSGNNNNNNNNNNNTTTTNTTNTGNSAKFYLR

B4QRCO\_DROST Window Position:410; Score=55.869 | Prion Domain: QQQQVQFNQFQQLQQQQQQQQQQQQQQQQQQQQQQQQQQQQQQQQQQQQQQQQQQQQQQQQQQQQ

B4QRNE\_DROST Window Position:307; Score=60.678 | Prion Domain: NNYSNYNNNNNNNNRRGGGNGGQQLQGGGGGNGGGGGGGGGGGNNNNNNNNNNNNNNNNNNNN

B4QAS4\_DROST Window Position:102; Score=71.820 | Prion Domain: QSGNQQQQQQQQQQQQQQQQQQQQQQQQQQQQQQQQQQQQQQQQQQQQQQQQQQQQQQQQQQQQQQ

B4QNX2\_DROST Window Position:653; Score=66.405 | Prion Domain: NYGSHLHQHQHQHQHQHQHQHQHQHQHQHQHQHQHQHQHQHQHQHQHQHQHQHQHQHQHQHQHQHQHQ

B4R086\_DROST Window Position:11; Score=55.395 | Prion Domain: NNNALQQQQQLQHLQHQHQHQHQHQHQHQHQHQHQHQHQHQHQHQHQHQHQHQHQHQHQHQHQHQHQ

B4R4D9\_DROST Window Position:109; Score=54.416 | Prion Domain: NSALNTYVAAAAAHHHHHHHHHHHHHHHHHHHHHHHHHHHHHHHHHHHHHHHHHHHHHHHHHHHH

B4QEX5\_DROST Window Position:388; Score=59.839 | Prion Domain: FQQQQQQQQQQQQQQQQQQQQQQQQQQQQQQQQQQQQQQQQQQQQQQQQQQQQQQQQQQQQQQ

B4RQ01\_DROST Window Position:372; Score=74.195 | Prion Domain: MQQQQQQQQQQQQQQQQQQQQQQQQQQQQQQQQQQQQQQQQQQQQQQQQQQQQQQQQQQQQQQQ

B4QWLO\_DROST Window Position:440; Score=50.336 | Prion Domain: QLQHPQLQLTQQLYQQQQQQQQQQGQFQQQQQQQQQQQQQQQQQQQQQQQQQQQQQQQQQQQQQQ

Q2XXC7\_DROST Window Position:364; Score=58.415 | Prion Domain: NANLH1QNFHQHQHQHQHQHQHQHQHQHQHQHQHQHQHQHQHQHQHQHQHQHQHQHQHQHQHQHQ

B4QED4\_DROST Window Position:1143; Score=67.503 | Prion Domain: QQQQQQQQQQQQQQQQQQQQQQQQQQQQQQQQQQQQQQQQQQQQQQQQQQQQQQQQQQQQQQQ

B4NS85\_DROST Window Position:77; Score=59.515 | Prion Domain: NNNNNANNNNNNNNNNNNNNNNNNNNNNNNNNNNNNNNNNNNNNNNNNNNNNNNNNNNNNNNNNN

F6JKB9\_DROST Window Position:3; Score=51.513 | Prion Domain: NAEQMGALLNQQLQTTAINGSTSSSSSSSGNNNNNNNNNNNTTTTNTTNTGNSAKFYLR

B4R763\_DROST Window Position:30; Score=72.078 | Prion Domain: QQQQHHLHQHQHQHQHQHQHQHQHQHQHQHQHQHQHQHQHQHQHQHQHQHQHQHQHQHQHQHQHQ

B4R523\_DROST Window Position:35; Score=81.274 | Prion Domain: HQHQHQHQHQHQHQHQHQHQHQHQHQHQHQHQHQHQHQHQHQHQHQHQHQHQHQHQHQHQHQHQHQ

B4R612\_DROST Window Position:108; Score=65.027 | Prion Domain: QQLQQQQQQHQHQHQHQHQHQHQHQHQHQHQHQHQHQHQHQHQHQHQHQHQHQHQHQHQHQHQHQ

F6JKD1\_DROST Window Position:3; Score=57.295 | Prion Domain: NAEQMGALLNQQLQTTAINGSTSSSSSSSGNNNNNNNNNNNTTTTNTTNTGNSAKFYLR

B4R4A0\_DROST Window Position:227; Score=57.803 | Prion Domain: MQQQQQQQQQQQQQQQQQQQQQQQQQQQQQQQQQQQQQQQQQQQQQQQQQQQQQQQQQQQQQQQ

B4QWLO\_DROST Window Position:60; Score=71.002 | Prion Domain: QQQQQQQQQQQQQQQQQQQQQQQQQQQQQQQQQQQQQQQQQQQQQQQQQQQQQQQQQQQQQQQ

B4QNM6\_DROST Window Position:64; Score=75.098 | Prion Domain: HHYQQYFQQHHLQHQHQHQHQHQHQHQHQHQHQHQHQHQHQHQHQHQHQHQHQHQHQHQHQHQHQ

B4QSR7\_DROST Window Position:403; Score=84.982 | Prion Domain: QQQQQQQQQQQQQQQQQQQQQQQQQQQQQQQQQQQQQQQQQQQQQQQQQQQQQQQQQQQQQQQ

B4R453\_DROST Window Position:51; Score=73.860 | Prion Domain: QQQQQQQQQQQQQQQQQQQQQQQQQQQQQQQQQQQQQQQQQQQQQQQQQQQQQQQQQQQQQQQ

B4RL10\_DROST Window Position:554; Score=61.496 | Prion Domain: QQQQQQQQQQQQQQQQQQQQQQQQQQQQQQQQQQQQQQQQQQQQQQQQQQQQQQQQQQQQQQQ

B4NV47\_DROST Window Position:379; Score=74.887 | Prion Domain: NQSGANRRGQQGNNNNNNNNNNNNNNNNNNNNNNNNNNNNNNNNNNNNNNNNNNNNNNNNNNNN

Q6V1R5\_DROST Window Position:101; Score=63.158 | Prion Domain: QQQQQQQQQYQATDLGNNYFFAQVLAQQVLAQQVLAQQVLAQQVLAQQVLAQQVLAQQVLAQQVLA

B4QYH2\_DROST Window Position:913; Score=68.617 | Prion Domain: QQQQQQQQQQQQQQQQQQQQQQQQQQQQQQQQQQQQQQQQQQQQQQQQQQQQQQQQQQQQQQQ

Q2UXN5\_DROST Window Position:77; Score=68.429 | Prion Domain: QQLQQQQHQHQHQHQHQHQHQHQHQHQHQHQHQHQHQHQHQHQHQHQHQHQHQHQHQHQHQHQ

Q2XXC6\_DROST Window Position:364; Score=58.415 | Prion Domain: NANLH1QNFHQHQHQHQHQHQHQHQHQHQHQHQHQHQHQHQHQHQHQHQHQHQHQHQHQHQHQHQ

B4R764\_DROST Window Position:706; Score=72.673 | Prion Domain: HQQQQQQQQQHQHQHQHQHQHQHQHQHQHQHQHQHQHQHQHQHQHQHQHQHQHQHQHQHQHQHQ

B4Q1K2\_DROST Window Position:1680; Score=72.074 | Prion Domain: QQNNYNNYQQPQLQDQQQQQQQQQQQQQQQQQQQQQQQQQQQQQQQQQQQQQQQQQQQQQQQQ

B4R482\_DROST Window Position:233; Score=80.996 | Prion Domain: HQSHQHQHQHQHQHQHQHQHQHQHQHQHQHQHQHQHQHQHQHQHQHQHQHQHQHQHQHQHQHQHQ

AY1H18\_DROST Window Position:192; Score=50.433 | Prion Domain: QQQQTFAAAAEQLQALAEQLQAEQLQAEQLQAEQLQAEQLQAEQLQAEQLQAEQLQAEQLQAEQLQ

B4QEG2\_DROST Window Position:61; Score=63.293 | Prion Domain: PHYHQHHQHHSHSAHTHHQHHKHHHHHHHHHHHHHHHHHHHHHHHHHHHHHHHHHHHHHHHH

B4Q9T1\_DROST Window Position:573; Score=51.855 | Prion Domain: QQQQQQQQQQQQQQQQQQQQQQQQQQQQQQQQQQQQQQQQQQQQQQQQQQQQQQQQQQQQQQQ

B4QPK9\_DROST Window Position:9; Score=51.509 | Prion Domain: SQGTSASNNSSSGNNSSSGNNSSSGNNSSSGNNSSSGNNSSSGNNSSSGNNSSSGNNSSSGNN

E6ZD19\_DROST Window Position:38; Score=66.072 | Prion Domain: SSSSSANSSSSSSSGNNSSSGNNSSSGNNSSSGNNSSSGNNSSSGNNSSSGNNSSSGNNSSSGNN

B4QB33\_DROST Window Position:919; Score=58.684 | Prion Domain: QATFQKQQQLQQQQQQLQQQQQQLQQQQQQLQQQQQQLQQQQQQLQQQQQQLQQQQQQLQQQQQQL

B4QEX4\_DROST Window Position:28; Score=71.396 | Prion Domain: LPNNNNNNNNNNNNNNNNNNNNNNNNNNNNNNNNNNNNNNNNNNNNNNNNNNNNNNNNNNNNNN

F6JKB2\_DROST Window Position:3; Score=57.295 | Prion Domain: NAEQMGALLNQQLQTTAINGSTSSSSSSSGNNNNNNNNNNNTTTTNTTNTGNSAKFYLR

B4QXR7\_DROST Window Position:353; Score=63.039 | Prion Domain: QTANGIYQMGSPNQTAAHLLQHQHQHQHQHQHQHQHQHQHQHQHQHQHQHQHQHQHQHQHQHQ

B4Q3C3\_DROST Window Position:295; Score=93.816 | Prion Domain: PNNQQQQQQQQQQQQQQQQQQQQQQQQQQQQQQQQQQQQQQQQQQQQQQQQQQQQQQQQQQQQ

B4R732\_DROST Window Position:545; Score=76.299 | Prion Domain: QQQ1QTQKQYQEKLMLQLQQQQQQQQQQQQQQQQQQQQQQQQQQQQQQQQQQQQQQQQQQQQQQ

B4QES2\_DROST Window Position:392; Score=73.294 | Prion Domain: QQQQQQQQQQQQQQQQQQQQQQQQQQQQQQQQQQQQQQQQQQQQQQQQQQQQQQQQQQQQQQQ

B4QFJ9\_DROST Window Position:120; Score=57.573 | Prion Domain: QQQQQQQQQQQQQQQQQQQQQQQQQQQQQQQQQQQQQQQQQQQQQQQQQQQQQQQQQQQQQQQ

AYK0Z2\_DROST Window Position:2; Score=57.295 | Prion Domain: NAEQMGALLNQQLQTTAINGSTSSSSSSSGNNNNNNNNNNNTTTTNTTNTGNSAKFYLR

B4QB56\_DROST Window Position:275; Score=66.233 | Prion Domain: HSGNLFQYVAGQFQSGFSGNLTAQQAQQQQMLQQQQQQQQQQQQQQQQQQQQQQQQQQQQQQQQ

B4R5D3\_DROST Window Position:341; Score=50.005 | Prion Domain: LNSANSSNNNNNNSSNNHSGSGAGTGGGGNNNNNNNNNNNNNNNNNNNNNNNNNNNNNNNNNN

B4QJ11\_DROST Window Position:183; Score=64.980 | Prion Domain: QQQQQQHQSHHQHAKFPHFRFLNNSFQIAGTQHQQQQQQQHQHQHQHQHQHQHQHQHQHQHQHQ

B4R320\_DROST Window Position:354; Score=75.972 | Prion Domain: KGGGQQQQQQQQQQQQQQQQQQQQQQQQQQQQQQQQQQQQQQQQQQQQQQQQQQQQQQQQQQQQ

B4R4R3\_DROST Window Position:59; Score=51.744 | Prion Domain: SAAAAATSSSTASSSDSLAQQQQQHQHQHQHQHQHQHQHQHQHQHQHQHQHQHQHQHQHQHQHQ

B4R667\_DROST Window Position:1027; Score=52.761 | Prion Domain: QQQQAAMSAAMQQQQVQAQQQAQQQAQQQAQQQAQQQAQQQAQQQAQQQAQQQAQQQAQQQAQQ

B4R722\_DROST Window Position:1; Score=78.341 | Prion Domain: QQQQQQQQQHQHQHQHQHQHQHQHQHQHQHQHQHQHQHQHQHQHQHQHQHQHQHQHQHQHQHQ

B4Q725\_DROST Window Position:371; Score=58.415 | Prion Domain: NANLH1QNFHQHQHQHQHQHQHQHQHQHQHQHQHQHQHQHQHQHQHQHQHQHQHQHQHQHQHQHQ

E6ZD35\_DROST Window Position:2; Score=55.850 | Prion Domain: MGALLNLQQLQTTAINGSTSSSSSSSGNNNNNNNNNNNTTTTNTTNTGNSAKFYLR

B4Q5F6\_DROST Window Position:28; Score=68.350 | Prion Domain





[illegible]



[illegible]

[illegible]







[illegible]







[illegible]
