# Supplementary material for: Discovering putative prion sequences in complete proteomes using probabilistic representations of Q/N-rich domains
Source: BMC Genomics. 2013 May 10;14:316. doi: 10.1186/1471-2164-14-316 (PMC3654983; doi:10.1186/1471-2164-14-316)
Supplement: Additional file 7 — Prion-forming domain predictions in Plants. [file 1471-2164-14-316-S7.pdf]

[illegible]

| ID                          | Species | Type                        | Position      | Score                                                             | Prion Domain |
|-----------------------------|---------|-----------------------------|---------------|-------------------------------------------------------------------|--------------|
| Q19NR1_ARATH                | Window  | Position=416; Score=78.958  | Prion Domain: | NQQGTSIQTIGGGGGQSGLGSQSMNSHSGQQQLGMQCGQLQGFQPGQMGGGGGGGGGGMGIN    |              |
| D3K0L1_ARATH                | Window  | Position=4;                 | Prion Domain: | QOQQQQQLSQQQQQQQLSQOQQQLSQOQQQLSQOQQQQAYLVGPETHPQSPQASQSNHLS      |              |
| QBL860_ARATH                | Window  | Position=548; Score=61.957  | Prion Domain: | NQFNGALSGSFQFPQQQQQQMMMAVYAAQQQLQQQQQQQAYGNMGGYGYNNQQGGGGS        |              |
| F4ICJ2_ARATH                | Window  | Position=581; Score=88.804  | Prion Domain: | QOQQQQQQIQQQQQQQQLHQQQMQQLSQOQQQQQQQQQQQQQLSLQHJHQHQGGGGGGG       |              |
| E1A6M1_ARATH                | Window  | Position=0; Score=50.998    | Prion Domain: | QLSQOQQQLSQOQQQQQLSQOQQQQAYLVGPETHPQSPQASQSNHLSQQQQQVVDNHN        |              |
| E1A6M0_ARATH                | Window  | Position=1; Score=50.998    | Prion Domain: | QLSQOQQQLSQOQQQQQLSQOQQQQAYLVGPETHPQSPQASQSNHLSQQQQQVVDNHN        |              |
| A5YZF2_ARATH                | Window  | Position=10; Score=69.354   | Prion Domain: | QOQQQQQQQQQQQQQQQQQQQQQQVTQNTSDSSQRSRVALMGQFNPNFYAFNAS            |              |
| F4KMS5_ARATH                | Window  | Position=514; Score=86.700  | Prion Domain: | NHQQQQSQQQQQQQQQQQLLQQOQLLQOQQSHNNNQSGQLLQGGQQLQQGHQFQ            |              |
| E1A6L2_ARATH                | Window  | Position=0; Score=50.998    | Prion Domain: | QLSQOQQQLSQOQQQQQLSQOQQQQAYLVGPETHPQSPQASQSNHLSQQQQQVVDNHN        |              |
| A5YZF1_ARATH                | Window  | Position=2; Score=67.500    | Prion Domain: | QASDQLRQQQQQQQQQQQQQQQQQQQQVTQNTSDSSQRSRVALMGQFNPNFYAFNAS         |              |
| QRTV5_ARATH                 | Window  | Position=0; Score=66.781    | Prion Domain: | QOQQQQQQQQQQQQQQQQQQQQVTQNTSDSSQRSRVALMGQFNPNFYAFNAS              |              |
| BZC6E8_ARATH                | Window  | Position=417; Score=78.958  | Prion Domain: | NQQGISITIGGGGGQSGLGSQSMNSHSGQQQLGMQCGQLQGFQPGQMGGGGGGGGGGMGIN     |              |
| A5YZE8_ARATH                | Window  | Position=2; Score=66.242    | Prion Domain: | QASDQLRQQQQQQQQQQQQQQQQQQQQVTQNTSDSSQRSRVALMGQFNPNFYAFNAS         |              |
| QBRRW9_ARATH                | Window  | Position=38; Score=50.065   | Prion Domain: | QONTNISFSQQSPQOTNITSIFSQCFOQYLFGPFGFQQQQQQQLNQOQQQQVQOQLYFTN      |              |
| E1AM63_ARATH                | Window  | Position=0; Score=59.550    | Prion Domain: | QOQQQLSQOQQQLSQOQQQQQLSQOQQQQAYLVGPETHPQSPQASQSNHLSQQQQQVVDNHN    |              |
| D3K052_ARATH                | Window  | Position=2; Score=61.999    | Prion Domain: | SQQQQQLSQOQQQQQLSQOQQQQAYLVGPETHPQSPQASQSNHLSQQQQQVVDNHN          |              |
| O80620_ARATH                | Window  | Position=465; Score=61.807  | Prion Domain: | HSSMLQDLRFMTISGMGTQQTQIQSQSQQQQQQQGGYGNGMTOQSGLPNFMNMQAQQ         |              |
| A5YZF3_ARATH                | Window  | Position=2; Score=66.242    | Prion Domain: | QASDQLRQQQQQQQQQQQQQQQQQQQQVTQNTSDSSQRSRVALMGQFNPNFYAFNAS         |              |
| Q4VC31_ARATH                | Window  | Position=458; Score=61.807  | Prion Domain: | HSSMLQDLRFMTISGMGTQQTQIQSQSQQQQQQQGGYGNGMTOQSGLPNFMNMQAQQ         |              |
| Q940AT_ARATH                | Window  | Position=419; Score=78.958  | Prion Domain: | NQQGISITIGGGGGQSGLGSQSMNSHSGQQQLGMQCGQLQGFQPGQMGGGGGGGGGGMGIN     |              |
| F4JVS1_ARATH                | Window  | Position=49; Score=61.808   | Prion Domain: | NQFNGALSGSFQFPQQQQQQMMMAVYAAQQQLQQQQQQQAYGNMGGYGYNNQQGGGGS        |              |
| ANL4_ARATH                  | Window  | Position=10; Score=61.808   | Prion Domain: | QOQQQQQQQQQQQQQQQQQQQQVTQNTSDSSQRSRVALMGQFNPNFYAFNAS              |              |
| QC9724_ARATH                | Window  | Position=35; Score=82.850   | Prion Domain: | QOQQQLSQOQQQQQLFHQQQQQTQQQQQFPQQQQQQQYVQFCQQHFQIQOQFQ             |              |
| D3K048_ARATH                | Window  | Position=4; Score=65.485    | Prion Domain: | QOQQQLSQOQQQQQLSQOQQQQQLSQOQQQQAYLVGPETHPQSPQASQSNHLS             |              |
| A5YZE9_ARATH                | Window  | Position=2; Score=55.040    | Prion Domain: | QASDQLRQQQQQQQQQQQQQQQQQQQQVTQNTSDSSQRSRVALMGQFNPNFYAFNAS         |              |
| QBLD29_ARATH                | Window  | Position=322; Score=64.540  | Prion Domain: | NQPFYNFMBSHTLAAGQLQLQSQRFQOQQQQQQQQQQQQQQFQQOQLVLQLO              |              |
| E1A6L8_ARATH                | Window  | Position=4; Score=78.413    | Prion Domain: | PQMLQQQLSQOQQQLSQOQQQQQLSQOQQQQQLSQOQQQQQLSQOQQQQAYLV             |              |
| E1A6M2_ARATH                | Window  | Position=4; Score=61.999    | Prion Domain: | SQQQQQLSQOQQQQQLSQOQQQQQLSQOQQQQAYLVGPETHPQSPQASQSNHLSQQQQQVVDNHN |              |
| QC9GM3_ARATH                | Window  | Position=388; Score=88.804  | Prion Domain: | QOQQQQQQIQQQQQQQQLHQQQMQQLSQOQQQQQQQQQQQLHSOLQHJHQHQGGGGGGG       |              |
| E1A6L7_ARATH                | Window  | Position=4; Score=65.485    | Prion Domain: | QOQQQQQLSQOQQQQQLSQOQQQQQLSQOQQQQQLSQOQQQQAYLVGPETHPQSPQASQSNHLS  |              |
| E1A6L4_ARATH                | Window  | Position=0; Score=61.999    | Prion Domain: | SQQQQQLSQOQQQQQLSQOQQQQQLSQOQQQQAYLVGPETHPQSPQASQSNHLSQQQQQVVDNHN |              |
| Q9B101_ARATH                | Window  | Position=35; Score=82.850   | Prion Domain: | QOQQQLSQOQQQQQLFHQQQQQTQQQQQFPQQQQQQQYVQFCQQHFQIQOQFQ             |              |
| PDGBL1_ARATH                | Window  | Position=311; Score=72.200  | Prion Domain: | NQQGTFYSNMSGTLLIAAQGLQITHSQGQQQQQQQQQQQQQQQQQQQYVQFCQQHFQIQOQFQ   |              |
| >Ricinus communis: Total=10 |         |                             |               |                                                                   |              |
| BRVUT7_RICCO                | Window  | Position=145; Score=59.983  | Prion Domain: | NNYNSVTNNSNNNGTYNNNYNNNGVGLASGYETGNNQNNKSYYTTTTTNNSNNNGTYNN       |              |
| BS9T76_RICCO                | Window  | Position=1211; Score=98.837 | Prion Domain: | MNNQQQQQQQLLQQOQLQGFQFQQQQQQQQQQQQQQQQQLLQOQLQOQQQQQQQQQQQQ       |              |
| BR9VB2_RICCO                | Window  | Position=106; Score=77.400  | Prion Domain: | NNDNNNNNGNNNNNGNNNNNNNNNNNNNDNDNNNGHGKHGNSHHNNNNNNNNNNNN          |              |
| BS9WL1_RICCO                | Window  | Position=382; Score=68.121  | Prion Domain: | QNATNMQNLQILGQGNNGVMGDMQQQLRLGGQNTINLQOQHQQHQHQHQHQHQHQHQHQ       |              |
| BS9SU7_RICCO                | Window  | Position=264; Score=61.304  | Prion Domain: | SQLVQQQPAMTHQHLQHQHQHQHQHQHQHQHQHQHQHQHQHQHQHQHQHQHQHQHQHQHQ      |              |
| BS9U10_RICCO                | Window  | Position=335; Score=51.079  | Prion Domain: | QGYFFNNHAMHTLLTTQOQFLQIHSGKHQHQHQHQHQHQHQHQHQHQHQHQHQHQHQHQ       |              |
| BR9T79_RICCO                | Window  | Position=96; Score=76.750   | Prion Domain: | SKGKGNNNNNNNNNNNNNNNNNNNNNNNNNNNNNNNNNNNNNNNNNNNNNNNNNNNNNN       |              |
| BR9BA4_RICCO                | Window  | Position=158; Score=64.495  | Prion Domain: | NIIDGNNNNNNNNNNNNNNNNNNNNNNNNNNNNNNNNNNNNNNNNNNNNNNNNNNNNNN       |              |
| BS9E76_RICCO                | Window  | Position=183; Score=56.134  | Prion Domain: | GFGQNFVRGLNINNNGNNNSNTNLSQLSSMLDNNNGNNNNNNNNNNNNNNNNNNNNNN        |              |
| BS9SB9_RICCO                | Window  | Position=16; Score=56.635   | Prion Domain: | QQTQEGSTQQQQQQQQQQQQQQQQQQQQPLQYFQQQYQFHQYHQTDQSSYYSYTQYFQTN      |              |
| >Vitis vinifera: Total=17   |         |                             |               |                                                                   |              |
| ASARH4_VITVI                |         |                             |               |                                                                   |              |

[illegible]

[illegible]
